# Supplementary material for: Synthesis, Identification and Antibacterial Activities of Amino Acid Schiff Base Cu(II) Complexes with Chlorinated Aromatic Moieties
Source: MDPI journal article supplement (doi:10.3390/applmicrobiol2020032), 2022-06-18
Supplement: s1 [file s1]

Archive with 1 entries (1 files):
- applmicrobiol-1742105-supplementary.pdf
